1 **Gastrodia-Uncaria Water Extract Inhibits Endoplasmic Reticulum Stress**  
2 **and Matrix Metalloproteinase in Protecting against Cerebral Ischemia**

3 CHOI Angus Yiu-Ting<sup>1,2</sup>, XIAN Jia Wen<sup>1,2</sup>, MA Sum Yi<sup>1</sup>,

4 LIN Zhixiu<sup>1</sup>, CHAN Chun Wai<sup>1,2</sup> \*

5

6

7 <sup>1</sup> School of Chinese Medicine, Lee Wai Chun Building, the Chinese University of Hong Kong,  
8 Shatin, Hong Kong

9 <sup>2</sup> Brain Research Center, Run Run Shaw Science Building, the Chinese University of Hong  
10 Kong, Shatin, Hong Kong

11

12

13 \*Correspondence to: CHAN Chun Wai

14

15 Address: Lee Wai Chun Building, the Chinese University of Hong Kong, Shatin, Hong Kong

16

17 E-mail: fcwchan@cuhk.edu.hk

18

19

20

21

22

## 23 **ABSTRACT**

24 Stroke is the second leading cause of death in worldwide, in which cerebral ischemia accounts for 87%  
25 of all cases. The building up of endoplasmic reticulum stress in cerebral ischemia contributes to the  
26 disruption of blood brain barrier and neuronal cell death. The only FDA-approved drug, recombinant  
27 tissue plasminogen activator, is still of limited use due to the narrow window period and lack  
28 of neuroprotective effect. Therefore, it is necessary to explore alternative treatment on cerebral  
29 ischemia. *Tianma-Gouteng* decoction is a traditional Chinese Medicine prescription used to  
30 treat brain diseases in China. In this study, we investigated the neuroprotective effect of a  
31 water extract consisting of *Gastrodia elata* and *Uncaria rhynchophylla*, which are the two main  
32 herbs in the decoction. Cerebral ischemia was induced in rats using middle cerebral artery  
33 occlusion. G UW-treated rats have significantly reduced infarction volume and recovered  
34 neurological functions. The number of protein aggregates and caspase-12 positive cells were  
35 significantly inhibited. *In vitro* oxygen-glucose deprivation / reoxygenation stroke model  
36 demonstrated that the unfolded protein response proteins GRP78 and PDI were upregulated by  
37 G UW. Less ubiquitin puncta and normalized ubiquitin distribution indicated the reduction in  
38 endoplasmic reticulum stress. Furthermore, a lower Evan blue signal and MMPsense signal  
39 was observed, suggesting that G UW may preserve the blood brain barrier integrity through  
40 inhibiting MMP activity. Taken together, this suggested that G UW protected ischemic neurons  
41 and the blood brain barrier through inhibiting endoplasmic reticulum stress.

## 42 **KEYWORDS**

43 Cerebral ischemia, herbal medicine, *Gastrodia-Uncaria* water extract, endoplasmic reticulum  
44 stress, matrix metalloproteinase

45

46

## 47 **INTRODUCTION**

48 Stroke is the second leading causes of death in worldwide, in which 87% of the stroke cases  
49 were cerebral ischemia [1]. After stroke, more than 60% of patients would experience  
50 neurological impairments and loss in locomotor functioning [1]. Recombinant tissue  
51 plasminogen activator (tPA) is the only prescribed medicine in worldwide. However, the  
52 shortcoming of tPA treatment are the narrow therapeutic window and increasing risk of  
53 intracerebral hemorrhage. Therefore, it is a challenge to seek for alternative treatment methods.

54 Cerebral ischemia is defined by the disruption of blood flow towards the brain tissue. Such a  
55 blockage is caused by the formation of thrombus and embolus, a plaque that could obstruct the  
56 blood vessel [2]. After the removal of the blood clot through mechanical thrombectomy or by  
57 using recombinant tissue plasminogen activator, blood supply is restored and reperfusion phase  
58 proceeds. During this phase, the calcium stores in the ER will be depleted, resulting in a  
59 decrease in protein folding efficiency and the accumulation of unfolded protein aggregates [3].  
60 Thus, endoplasmic reticulum stress is built up. The unfolded protein response (UPR) is a  
61 mechanism to counteract ER stress [4]. Chaperones such as GRP78, protein disulfide  
62 isomerase (PDI) are upregulated to assist in proper folding of the protein aggregates to attenuate  
63 ER stress [5]. Nonetheless, if ER stress persists for a long period of time, caspase-12 is  
64 activated to trigger cell death [6].

65 The increase in ER stress leads to the activation of matrix metalloproteinases (MMP), causing  
66 the disruption of blood brain barrier [7]. The activation of MMP during cerebral ischemia can  
67 cause irreversible loss of blood brain barrier (BBB) integrity, edema formation, hemorrhagic  
68 transformation, and further neuronal cell death [8,9]. Inhibition of MMP may protect BBB  
69 disruption through reducing brain microvascular endothelial cell damage [10]. The above  
70 indicated inhibiting ER stress may be beneficial in protecting against BBB dysfunction.

71 *Gastrodia elata* (GE) and *Uncaria rhynchophylla* (UR) are the two main herbs in *Tianma-*  
72 *Gouteng* decoction, a Chinese Medicine prescription that is used to treat head related disease  
73 such as stroke. We have previously found that GE and UR in the *Gastrodia-Uncaria* water  
74 extract (GUW) work synergistically to protect against cerebral ischemia through inhibiting  
75 oxidative stress and apoptosis [11]. Metabolomics analysis of the cerebral spinal fluid revealed  
76 changes in the amount of endoplasmic reticulum stress-related metabolites in GUW-treated  
77 ischemic rats [12]. In this study, we investigated the effects of GUW in protecting against  
78 cerebral ischemia-induced apoptosis through reducing ER stress and preserving blood brain  
79 barrier integrity.

## 80 **METHODS AND MATERIALS**

### 81 *Reagents*

82 All chemicals, culture medium and secondary antibodies are purchased in Thermo Fisher  
83 Scientific (Carlsbad, CA, USA) unless specified. Primary antibodies were purchased from  
84 Abcam (Cambridge, UK).

### 85 *Herbal extract preparation*

86 GUW, GE, and UR were prepared as previously mentioned [11]. HPLC of the herbal extracts  
87 were performed with the chemical markers for quantification and authentication [11].

### 88 *Middle cerebral artery occlusion (MCAO)*

89 All animal experimental procedures were conducted with the approval from the Animal Ethics  
90 Committee of the Chinese University of Hong Kong (ref. No.: 11/068/MIS-5). MCAO was  
91 adopted from previous study [11]. Briefly, male Sprague Dawley rats of 260–280 g were used  
92 for the study and were housed in a 12 h: 12 h light-dark cycle environment, fed with chow and  
93 water *ad libitum*. The rats were first anesthetized with 400 mg/kg chloral hydrate (VWR

94 International; Poole, England) injected intraperitoneally. The right external carotid artery was  
95 excised and ligated. A round-tipped 4-0 nylon suture was inserted towards the middle cerebral  
96 artery via the internal carotid artery. The middle cerebral artery was occluded by the nylon  
97 suture for 2 h. The suture was then removed and the external carotid artery was cauterized.  
98 The operated rats were caged individually and warmed with a heating lamp. The same  
99 operation procedures were carried out on the sham rats but without inserting the nylon suture  
100 to occlude the middle cerebral artery.

#### 101 *GUV treatment and assessment*

102 GUV powder was dissolved in ddH<sub>2</sub>O and was orally administered to the MCAO rats with a  
103 human equivalent dosage of 288.6 mg/kg GUV once daily for seven consecutive days [13].  
104 One group of rats subjected to MCAO received GUV treatment. The rest of the MCAO rats  
105 and sham rats are fed with ddH<sub>2</sub>O. After treatment, neurological deficit score and triphenyl  
106 tetrazolium chloride (TTC) staining were performed to assess the brain infarct volume and  
107 neurological functioning as previously described [11].

#### 108 *Cresyl violet staining*

109 Another set of brains were harvested and fixed in buffered 10% formalin through intracardial  
110 perfusion. They were then dehydrated in 70% ethanol. The slices were dehydrated in 100%  
111 ethanol and embedded in wax. Brain sections were cut at 5 µm thickness. After hydration of  
112 the slides using a decreasing ethanol gradient, the slides were placed into the cresyl violet  
113 solution for 10 min at 60°C. The slides were then dehydrated and mounted with DPX. The  
114 total number of cells with intensely stained Nissl bodies were counted in five random views in  
115 the penumbra region using ApoTome.2 fluorescence microscopy (Carl Zeiss AG; Oberkochen,  
116 Germany).

#### 117 *Evans blue assay*

118 Evans blue staining was performed to evaluate the effect of GUV treatment on BBB  
119 permeability after MCAO-induced injury. At day 7 of post-operation, the animals were  
120 infused with 2 ml/kg of 2% Evans blue dye in saline (Sigma Aldrich, MO, USA) through  
121 the tail vein. After 2 h, rats were anesthetized and transcidentally perfused with PBS until a  
122 colorless perfusion fluid was obtained from the right atrium. The brains were harvested and  
123 washed with PBS. brain imaging was conducted via in vivo MS FX-Pro system (Carestream  
124 Health, Inc., NY, USA) at an excitation wavelength of 620 nm and emission wavelength of  
125 700 nm. The near infrared fluorescent signal in region of interest (ROI) of ischemia  
126 hemisphere was measured as compared with the contralateral hemisphere of brain [14]. The  
127 target-to-background ratio (TBR) of near infrared fluorescent signal was calculated.

#### 128 *In vivo* and *ex vivo* near-infrared fluorescence imaging

129 The near infrared fluorescent dye MMPsense 680 (PerkinElmer Inc, MA, USA) was used to  
130 monitor the MMP activity. The MMPSense 680 was injected intravenously through tail vein  
131 with a volume of 200  $\mu$ l, equivalent to 4 nmol per rat at day 2 of post-stroke. After  
132 anaesthetized with 1% isoflurane gas by inhalation, the rat is put into in vivo MS FX-Pro  
133 system and exposed with an excitation wavelength of 650 nm, the near-infrared fluorescent  
134 signal (NIRF) of MMPsense 680 is measured at emission wavelength of 700 nm at day 3, 5  
135 and 7. At day 7 post-operation, the whole brain is harvested. The MMPsense 680 NIRF  
136 signal of harvested whole brain and brain slices in 2mm thick was measured. The near  
137 infrared fluorescent signal in RIO is measured as compared with the contralateral hemisphere  
138 of brain. TBR of near infrared fluorescent signal was calculated as previously mentioned  
139 [15].

#### 140 *Immunohistochemistry*

141 Antigen retrieval was carried out by placing the slides in boiling citrate buffer for 20 min. The  
142 tissues were blocked with 10% goat serum, 1% BSA in PBS for 1 h. The slides were then  
143 incubated with primary antibodies overnight at 4°C, followed by incubation of secondary  
144 antibodies for 1 h at room temperature. The tissues were mounted with ProLong Gold Antifade  
145 Reagent with DAPI. The concentrations of the antibody used are as follow: Rabbit anti-  
146 Ubiquitin, 1:100; Mouse anti-Caspase-12, 1:100; Goat anti-rabbit IgG (H+L) with Alexa Fluor  
147 488 conjugate, 1:200; Goat anti-mouse IgG (H&L) with Alexa Fluor 594 conjugate, 1:200.  
148 Fluorescence microscopy was carried out using ApoTome.2 fluorescence microscopy.

#### 149 *Cell culture and differentiation*

150 SK-N-SH cells (ATCC HTB-11) were obtained from American Type Culture Collection  
151 (ATCC; Manassas, VA). The cells were cultured with RPMI 1640 medium supplemented with  
152 10% FBS and 1% penicillin/streptomycin/neomycin. Cell cultures were incubated under 5%  
153 CO<sub>2</sub> at 80% humidity unless specified. Cells were differentiated with neuronal phenotype used  
154 a protocol mentioned previously with modifications in a 35 mm 6-well plate [16]. The plate  
155 was pre-coated with poly-L-lysine for neuronal cell adhesion. SK-N-SH cells were then seeded  
156 at a density of 1 x 10<sup>5</sup> cells/well and cultured with RPMI 1640 medium supplemented with  
157 10% FBS, 1% penicillin-streptomycin for the first two days. The wells were washed with FBS-  
158 free RMPI 1640 before adding RMPI 1640 supplemented with 1% FBS and 10 µM retinoic  
159 acid. The cells were then cultured for four days to obtain the neuronal phenotype.

#### 160 *Cytoviability assay of extracts*

161 SK-N-SH cells were seeded in 96-well plates at a density of 15000 cells / well and were  
162 differentiated as above mentioned. The culture medium was then replaced with 100 µl of RA  
163 containing RPMI 1640 medium added with GUW, GE, and UR of several concentrations. The  
164 plate was incubated at 37 °C under air with 21% O<sub>2</sub> and 5% CO<sub>2</sub> at 80% humidity for 24hr.

165 After 24 hr, the wells were aspirated and 100 µl of 0.5 mg/ml MTT was added to each well.  
166 After incubation for 3 h, the solution was drawn out and 100 µl DMSO was added to each well.  
167 An addition lane was added with DMSO to serve as the solvent control. The plate was then  
168 placed into a BioTek µQuant microplate reader (BioTek; Winooski, VT, US) and the optical  
169 density at 570 nm was recorded by the Gen5 Data Analysis Software (BioTek; Winooski, VT,  
170 US). The cell viability of treated samples was normalized to normoxic control as:

$$171 \quad Viability = \frac{\text{Treatment Group } OD_{570}}{\text{Control Group } OD_{570}} \times 100\%$$

#### 172 *Oxygen-glucose deprivation / reperfusion (OGD/R)*

173 The induction of OGD was adapted from Tabakman's method [17]. Neuronal differentiated  
174 SK-N-SH in 6-well plates were washed with 1 ml glucose-free RPMI 1640 twice. Afterward,  
175 GUV were added at concentrations of either 500 or 1000 µg/ml in glucose-free RPMI 1640  
176 medium. The cell cultures were placed in a hypoxia incubation chamber (Stemcell  
177 Technologies; Vancouver, BC, Canada) filled with 95% N<sub>2</sub>, 5% CO<sub>2</sub> (Hong Kong Specialty  
178 Gases Co. Ltd.; HK, China). The cultures in the hypoxia chamber were kept for 7 h to undergo  
179 the ischemic phase. After OGD, the culture medium was refreshed with glucose containing  
180 RPMI 1640 supplemented with 1% FBS, 10 µM RA and 1% penicillin/streptomycin/neomycin  
181 and were kept under normoxic conditions for 17 h to carry out the reoxygenation phase.  
182 Normoxic controls were incubated at 37 °C normoxic condition with the differentiation  
183 medium at the same time point with the OGD group.

#### 184 *Immunocytochemistry*

185 The amount of unfolded proteins in terms of ubiquitinated aggregates and neuronal  
186 morphology was examined using immunocytochemistry. Glass coverslips (Paul Marienfeld  
187 GmbH & Co. KG; Lauda-Königshofen, Germany) were coated with poly-L-lysine and placed



188 in six-well plates. The cells were fixed with 4% paraformaldehyde in PBS for 10 min at room  
189 temperature and permeabilized using 0.01% Triton X-100 in PBS. The cells were blocked with  
190 10% goat serum, 1% BSA in PBS-T for 1 hr. The cells were then incubated with primary  
191 antibodies in 10% goat serum, 1% BSA in PBST overnight at 4°C, followed by incubated with  
192 secondary antibodies in 10% goat serum, 1% BSA in PBST for 1 h at room temperature. The  
193 glass coverslips are mounted on glass slides with ProLong Gold Antifade Reagent with DAPI.  
194 The concentrations of the antibody used are as follow: Rabbit anti-Ubiquitin, 1:100; Mouse  
195 anti-Neurofilament 160kDa, 1:100; Goat anti-rabbit IgG (H+L) with Alexa Fluor 488  
196 conjugate, 1:400; Goat anti-mouse IgG (H+L) with Alexa Fluor 594 conjugate, 1:200. Images  
197 were captured using ApoTome.2. Ubiquitinated protein aggregates is defined as the green  
198 puncta present in the image. Two neurons are defined as connected when the axons were  
199 observed linked together. The number of puncta and connections were counted in five different  
200 regions within a sample.

### 201 *Statistical analysis*

202 Results obtained were statistically compared using SPSS20 (IBM.; North Castle, NY, USA).  
203 One-way ANOVA *post hoc* Tukey's test was used in all data sets besides from cytotoxicity  
204 test and OGD/R cell viability assessment. One-way ANOVA *post hoc* Dunnet's test was used  
205 on the above mentioned two data set. Student's t-test was used in Evan's blue and MMPsense  
206 assay.  $p < 0.05$  was considered to be statistically significant.

## 207 **RESULTS**

### 208 *GUW protected against cerebral ischemia*

209 The neurological deficit score was assessed on day 1 and 7 post-operation (Fig. 1a). At day 1,  
210 a significant increase in neurological deficit score was observed in MCAO ( $p < 0.001$ ) and  
211 GUW rats ( $p < 0.001$ ) when compared with sham group rats; insignificant difference ( $p > 0.05$ )

212 was found between MCAO and G UW rats. G UW rats had significant improvements in  
213 neurological deficits on day 7 when compared with the score on day 1 ( $p < 0.001$ ) and MCAO  
214 rats on day 7 ( $p < 0.001$ ). While the mean neurological deficit score didn't significantly  
215 improve in the MCAO rats at day 7 ( $p > 0.05$ ) and remained significantly higher than the sham  
216 rats ( $p < 0.001$ ), insignificant difference was found between G UW rats and sham rats on day 7  
217 ( $p > 0.05$ ). TTC staining was performed to examine the infarction volume (Fig. 1b). The brain  
218 was significantly infarcted by 45.6% after MCAO ( $p < 0.001$ , Fig. 1c). G UW treatment rats,  
219 the infarct volume was significantly reduced by 55.7% when compared with MCAO rats ( $p <$   
220 0.001).

#### 221 *G UW reduced ER stress*

222 To investigate the effect of MCAO and G UW on neurons, cresyl violet staining was used.  
223 Under a higher magnification, two types of staining patterns could be observed (Fig. 2a). The  
224 first type of cell with faint color staining and larger cell body indicated living neurons. The  
225 second type of cells is intensely stained in purple with a small cell size. After MCAO, 33.8%  
226 cells were faintly stained, which was significantly fewer than the sham group rats ( $p < 0.001$ ;  
227 Fig. 2b). G UW treatment led to a significant increase in this type of cell population by 53.0%  
228 ( $p < 0.001$ ), yet it is significantly fewer than that in the sham group rats ( $p < 0.001$ ).

229 Immunohistochemistry was used to study the amount of protein aggregates and protein  
230 expression of caspase-12 at the infarct region. In MCAO rats, ubiquitinated protein aggregates  
231 were present in the cell body and the ubiquitin distribution was retracted to the soma (Fig. 2c).  
232 For G UW group, the number of aggregates was significantly reduced by 88.3% ( $p < 0.001$ ; Fig.  
233 2d). Furthermore, a normal ubiquitin distribution was observed. The caspase-12 expression  
234 was upregulated at the infarct region in the MCAO rats when compared to the sham rats (Fig.

235 2e). The number of caspase-12 positive cells was reduced significantly by 46.6% in GUW-  
236 treated rats ( $p < 0.001$ ; Fig. 2f).

### 237 *GUW Protected Against OGD/R*

238 The cytotoxicity of GE, UR and GUW were examined using MTT assay (Fig. 3a). After 24 h  
239 of incubation, no significant toxicity was observed in GE up to the maximally tested  
240 concentration at 4000  $\mu\text{g/ml}$  (99.9%,  $p > 0.05$ ). However, significant toxicity was observed in  
241 UR at concentrations above 250  $\mu\text{g/ml}$  (72.74%,  $p < 0.001$ ). Nearly all the cells are non-viable  
242 at concentrations above 1000  $\mu\text{g/ml}$  (6.28%,  $p < 0.001$ ). For GUW, insignificant toxicity was  
243 observed up to concentrations at 500  $\mu\text{g/ml}$  (95.50%,  $p > 0.05$ ). Based on the cytotoxicity  
244 profile, GUW at concentrations of 500 and 1000  $\mu\text{g/ml}$  were used in OGD/R assays. MMT  
245 assay showed that GUW at 500 and 1000  $\mu\text{g/ml}$  significantly increased the cell viability by  
246 21.36% and 19.29% after OGD/R ( $p < 0.05$ ; Fig. 3b). GE group showed 13% higher cell  
247 viability than the control group ( $p < 0.05$ ). UR concentrations at 50 and 100  $\mu\text{g/ml}$  did not lead  
248 to significant protective effect. Furthermore, UR induced significant toxicity when 500  $\mu\text{g/ml}$   
249 UR was administered after OGD/R ( $p < 0.01$ ). The neurite connectivity was observed using  
250 immunocytochemistry (Fig. 3c). GUW treatment significantly rescued the connectivity  
251 between the neuronal cells by 46.3% after OGD/R insults ( $p < 0.05$ ; Fig. 3d).

### 252 *GUW protected against ER stress through upregulating UPR*

253 More unfolded proteins were present in the OGD/R neurons (Fig. 4a). Moreover, a retraction  
254 of ubiquitin from the neurites to the cell was observed, indicating the occurrence of  
255 neurodegeneration. After treating with GUW, the amount of unfolded proteins was reduced  
256 significantly by 26.4%, while ubiquitin was normally distributed throughout the neuronal cell  
257 (Fig. 4b). Western blot showed that GUW led to an increase in expression of chaperone  
258 proteins GRP78, PDI expression (Fig 4c). A downregulation of XBP-1(u) was detected. We

259 further investigated the expression of caspase-12, the initiator caspase of ER stress-induced  
260 apoptosis. An upregulation of pro-caspase-12 expression was observed in G UW treatment  
261 groups.

#### 262 *G UW treatment reduced BBB impairment*

263 Evans blue signal was detected at the left hemisphere after the induction of ischemic insult  
264 at both control and G UW treatment group (Fig. 5a). TBR of Evans blue signal in G UW  
265 treatment group was 42.3% lower than MCAO group ( $p<0.001$ ; Fig. 5b).

#### 266 *G UW inhibited near-infrared fluorescence signal of matrix metalloproteinases activity*

267 NIRF images were obtained at day 3, 5 and 7 of post-operation. A lower fluorescence  
268 intensity was observed in the ischemic lesion of G UW treatment group rats compared with  
269 MCAO control group (Fig. 6a & 6b). The treatment with G UW led to significant reduction  
270 of the fluorescent intensity of matrix metalloproteinases by 25.1 ( $p<0.001$ ), 21.6 ( $p<0.01$ ),  
271 and 24.3% ( $p<0.05$ ) at day 3, 5 and 7 respectively (Fig. 6c).

272 *Ex vivo* brain NIRF imaging was conducted to exclude any possibility of interference caused  
273 *in vivo*. At day 7 of post-operation, MMP activities were found in the left hemisphere of  
274 MCAO rats (Fig. 7a). The TBR of MMP in MCAO rats was 1.34 fold of sham group  
275 ( $p<0.001$ ). G UW treatment led to a significant reduction in the TBR by 26.2% when  
276 compared with MCAO rats (Fig. 7c and 7e). NIRF imaging of the brain slices (Fig. 7b and  
277 7d) and from the corresponding brains showed that TBRs in G UW-treated rats were 32.7%  
278 lower than that in MCAO group (Fig. 7f;  $p <0.001$ ).

## 279 **DISCUSSION**

280 Brain stroke is the second leading causes of death in worldwide. Yet, there is currently no  
281 available FDA-approved medication in treating cerebral ischemia at reperfusion phase. In this

282 study, we showed that G UW may significantly protect the brain reperfusion injury followed by  
283 ischemic insults through reducing ER stress and preserving BBB integrity.

284 Seven days of reperfusion was allowed for observing the effect of G UW on recovery.  
285 Inignificant difference was found in neurological deficit score between day 1 and day 7 in  
286 MCAO rats, which echoed the previous finding that no changes in infarction volume of rat  
287 brains were observed after day 1 of reperfusion [18]. Thus, reducing the neurological and  
288 locomotor functioning deficits are pivotal in treating stroke. In cortical brain development, the  
289 amount of Nissl substance in the small intensely stained neurons positively correlates to the  
290 endoplasmic reticulum stress [19]. Cells in MCAO were mostly intensely stained with cresyl  
291 violet and small in shape, indicating the loss of cytoplasmic material and the persistence of ER  
292 stress. In G UW rats, the amount of intensely stained neurons was much less than that in MCAO  
293 rats, though there were still neurons were suffering from ischemic insults. This not only  
294 showed that G UW reduced the reperfusion injury on neurons, but also suggested that the  
295 endoplasmic reticulum stress in neurons may be inhibited in terms of the reduce in Nissl bodies.

296 G UW treatment reduced the number of aggregates and caspase-12 after MCAO [20]. This  
297 suggested that G UW suppressed ER stress *in vivo* to protect against endoplasmic reticulum  
298 stress. Ischemic rats were found to have protein aggregates formed only in the ipsilateral side  
299 of the ischemic brain after 30 minutes of reperfusion [21,22]. Proteome analysis revealed 520  
300 proteins being ubiquitinated after cerebral ischemia. Among the protein aggregates, 31% of  
301 the proteins within the aggregates are related to protein synthesis and DNA binding, which are  
302 essential for cellular survival [23]. As ER stress persists, pro-apoptotic ER stress markers such  
303 as caspase-12 and CHOP are found to be significantly upregulated in rat stroke models [24].  
304 In MCAO rat models, upregulation of UPR was found after 7 h of MCAO [24]. Our results  
305 demonstrated G UW inhibited ER stress through reducing the accumulation of protein  
306 aggregates and thus suppressing caspase-12 activity.

307 *In vitro* study was carried out to visualize the intracellular events in OGD/R. GE and GUW  
308 extract led to a higher SK-N-SH viability. Furthermore, neurodegeneration may occur in CNS  
309 neurons after damages, which may lead to neuronal dysfunction [25,26]. After addition of  
310 GUW, the dendritic length and connections were maintained as compared with OGD/R group.  
311 From western blotting results, it was found that GRP78 and PDI were upregulated by GUW.  
312 Chaperones GRP78 and PDI were studied because these two enzymes played important roles  
313 in UPR. GRP78 is the master regulator of UPR and it is a major chaperone participating in the  
314 protein folding process during UPR [27]. The increase in GRP78 protects neurons against  
315 ischemic insults through inhibiting caspase-7 and caspase-12 activity [28,29]. Thus,  
316 upregulation of GRP78 is crucial in the protection against reperfusion injury. PDI is a  
317 chaperone located in the ER that is responsible for forming disulfide bridges between cysteine  
318 residues [30]. Overexpression PDI reduces the number of protein aggregates within motor  
319 neurons, suggesting the importance of this chaperone in reducing UPR [31]. Furthermore, PDI  
320 could reduce oxidative stress through either reducing disulfide bridges on oxidized substrates  
321 or interact with NAPDH oxidase to undergo the reduction reactions [32]. The upregulation of  
322 GRP78 and PDI underlined the mechanism of how GUW may reduce the number of protein  
323 aggregates to suppress ER stress. Immunocytochemistry could exhibit the aggregates, as the  
324 presence of ubiquitin puncta indicates the formation of ubiquitinated-protein aggregates [33].  
325 From our results, there was an increase in the amount of ubiquitin puncta formed within the  
326 cell body after OGD/R, while the spots were reduced in GUW. These evidence suggested that  
327 GUW might reduce the number of protein aggregates during reperfusion.

328 The NIRF and Evans blue results suggested that GUW inhibited the expression of MMPs  
329 and preserved the BBB integrity. Increase in ER stress may lead to the activation of various  
330 MMPs, including MMP-2, MMP-3, and MMP-9 [34,35]. Furthermore, recent studies  
331 showed that the upregulation MMPs may enhance ER stress in return and accelerate

332 neurodegeneration [36,37]. In cerebral ischemia, patients with MMP activity at early  
333 reperfusion phase is a predictor of better clinical outcome [38,39]. The inhibition effect of  
334 GUV on matrix metalloproteinases may play a crucial role in repairing of the ischemic brain,  
335 particularly during angiogenesis and reestablishment of cerebral blood flow [40,41].

336 Together, GUV protected against reperfusion injury through the reduction of endoplasmic  
337 reticulum stress by upregulating the chaperones in UPR. Subsequently, the amount of the  
338 protein aggregates within the ischemic neurons was reduced and inhibited caspase-12  
339 activation due to ER stress. Therefore, ER stress-induced apoptosis was prevented by GUV  
340 treatment in neurons during reperfusion phase.

#### 341 **ACKNOWLEDGMENTS**

342 This study was supported by the HKSAR Health and Medical Research Fund (Ref: 11120381).

#### 343 **AUTHOR DISCLOSURE STATEMENT**

344 The authors declare no competing interests.

#### 345 **REFERENCES**

- 346 1. Mozaffarian D, Benjamin EJ, Go AS, Arnett DK, Blaha MJ, Cushman M, et al. Heart Disease  
347 and Stroke Statistics-2016 Update: A Report From the American Heart Association.  
348 *Circulation*. 2016;133:e38-60.
- 349 2. Lyaker MR, Tulman DB, Dimitrova GT, Pin RH, Papadimos TJ. Arterial embolism. *Int. J.*  
350 *Crit. Illn. Inj. Sci.* 2013;3:77–87.
- 351 3. Torres M, Encina G, Soto C, Hetz C. Abnormal calcium homeostasis and protein folding  
352 stress at the ER: A common factor in familial and infectious prion disorders. *Commun.*  
353 *Integr. Biol.* 2011;4:258–61.

- 354 4. Hetz C, Chevet E, Harding HP. Targeting the unfolded protein response in disease. *Nat. Rev.*  
355 *Drug Discov.*; 2013;12:703–19.
- 356 5. Mahdi AA, Rizvi SH, Parveen A. Role of Endoplasmic Reticulum Stress and Unfolded  
357 Protein Responses in Health and Diseases. *Indian J. Clin. Biochem.* 2016;31:127–37.
- 358 6. Zhu H, Zhu H, Xiao S, Sun H, Xie C, Ma Y. Activation and crosstalk between the  
359 endoplasmic reticulum road and JNK pathway in ischemia-reperfusion brain injury.  
360 *Acta Neurochir.* 2012;154:1197–203.
- 361 7. Ko AR, Kim JY, Hyun HW, KimJE. Endothelial NOS activation induces the blood-brain  
362 barrier disruption via ER stress following status epilepticus. *Brain Res.* 2015;1622:163–  
363 73.
- 364 8. Lakhan SE, Kirchgessner A, Tepper D, Leonard A. Matrix metalloproteinases and blood-  
365 brain barrier disruption in acute ischemic stroke. *Front. Neurol.* 2013;4:32.
- 366 9. Turner RJ, Sharp FR. Implications of MMP9 for blood brain barrier disruption and  
367 hemorrhagic transformation following ischemic stroke. *Front. Cell. Neurosci.*  
368 2016;10:56.
- 369 10. Reuter B, Rodemer C, Grudzenski S, Meairs S, Bugert P, Hennerici MG, et al. Effect of  
370 simvastatin on MMPs and TIMPs in human brain endothelial cells and experimental  
371 stroke. *Transl. Stroke Res.* 2015;6:156–9.
- 372 11. Xian JW, Choi AY, Lau CB, Leung WN, Ng CF, Chan CW. Gastrodia and Uncaria (tianma  
373 gouteng) water extract exerts antioxidative and antiapoptotic effects against cerebral  
374 ischemia in vitro and in vivo. *Chin. Med.* 2016;11:27.
- 375 12. Huan T, Xian JW, Leung WN, Li L, Chan CW. Cerebrospinal Fluid Metabolomics After  
376 Natural Product Treatment in an Experimental Model of Cerebral Ischemia. *Omics.*



- 377 2016;20:670–80.
- 378 13. Food and Drug Administration. Guidance for Industry - Estimating the Maximum Safe  
379 Starting Dose in Initial Clinical Trials for Therapeutics in Adult Healthy Volunteers.  
380 Washington D.C.; 2005.
- 381 14. Klohs J, Steinbrink J, Nierhaus T, Bourayou R, Lindauer U, Bahmani P, et al. Noninvasive  
382 near-infrared imaging of fluorochromes within the brain of live mice: an in vivo  
383 phantom study. *Mol. Imaging*. 2006;5:180–7.
- 384 15. Klohs J, Baeva N, Steinbrink J, Bourayou R, Boettcher C, Roysl G, et al. In vivo near-  
385 infrared fluorescence imaging of matrix metalloproteinase activity after cerebral  
386 ischemia. *J. Cereb. Blood Flow Metab.* Nature Publishing Group; 2009;29:1284–92.
- 387 16. Singh A, Rokes C, Gireud M, Fletcher S, Baumgartner J, Fuller G, et al. Retinoic acid induces  
388 REST degradation and neuronal differentiation by modulating the expression of SCF( $\beta$ -  
389 TRCP) in neuroblastoma cells. *Cancer*. 2011;117:5189–202.
- 390 17. Tabakman R, Jiang H, Shahar I, Arien-Zakay H, Levine RA, Lazarovici P. Neuroprotection  
391 by NGF in the PC12 in vitro OGD model: involvement of mitogen-activated protein  
392 kinases and gene expression. *Ann. N. Y. Acad. Sci.* 2005;1053:84–96.
- 393 18. Liu F, Schafer DP, McCullough LD. TTC, fluoro-Jade B and NeuN staining confirm  
394 evolving phases of infarction induced by middle cerebral artery occlusion. *J. Neurosci.*  
395 *Methods*. 2009;179:1–8.
- 396 19. Kondo S, Al-Hasani H, Hoerder-Suabedissen A, Wang WZ, Molnár Z. Secretory function  
397 in subplate neurons during cortical development. *Front. Neurosci.* 2015;9:100.
- 398 20. García CS, Massieu L. Caspases and their role in inflammation and ischemic neuronal death.  
399 Focus on caspase-12. *Apoptosis*. 2016;21:763-77.

- 400 21. Liu CL, Martone ME, HuBR. Protein ubiquitination in postsynaptic densities after transient  
401 cerebral ischemia. *J. Cereb. Blood Flow Metab.* 2004;24:1219–25.
- 402 22. Hochrainer K, Jackman K, Anrather J, Iadecola C. Reperfusion rather than ischemia drives  
403 the formation of ubiquitin aggregates after middle cerebral artery occlusion. *Stroke.*  
404 2012;43:2229–35.
- 405 23. Iwabuchi M, Sheng H, Thompson JW, Wang L, Dubois LG, Gooden D, et al.  
406 Characterization of the ubiquitin-modified proteome regulated by transient forebrain  
407 ischemia. *J. Cereb. Blood Flow Metab.* 2014;34:425–32.
- 408 24. Xu JH, Huang YM, Ling W, Li Y, Wang M, Chen XY, et al. Wen Dan Decoction for  
409 hemorrhagic stroke and ischemic stroke. *Complement. Ther. Med.* 2015;23:298–308.
- 410 25. FurutaniR, KibayashiK. Morphological alteration and reduction of MAP2-  
411 immunoreactivity in pyramidal neurons of cerebral cortex in a rat model of focal cortical  
412 compression. *J. Neurotrauma.* 2012;29:1266–76.
- 413 26. Gao X, Deng P, Xu ZC, Chen J. Moderate traumatic brain injury causes acute dendritic and  
414 synaptic degeneration in the hippocampal dentate gyrus. *PLoS One.* 2011;6:e24566.
- 415 27. Li J, Ni M, Lee B, Barron E, Hinton DR, Lee AS. The unfolded protein response regulator  
416 GRP78/BiP is required for endoplasmic reticulum integrity and stress-induced  
417 autophagy in mammalian cells. *Cell Death Differ.* 2008;15:1460–71.
- 418 28. Ye Z, Wang N, Xia P, Wang E, Liao J, Guo Q. Parecoxib suppresses CHOP and Foxo1  
419 nuclear translocation, but increases GRP78 levels in a rat model of focal ischemia.  
420 *Neurochem. Res.* 2013;38:686–93.
- 421 29. Reddy RK, Mao C, Baumeister P, Austin RC, Kaufman RJ, Lee AS. Endoplasmic reticulum  
422 chaperone protein GRP78 protects cells from apoptosis induced by topoisomerase

- 423 inhibitors: role of ATP binding site in suppression of caspase-7 activation. *J. Biol. Chem.*  
424 2003;278:20915–24.
- 425 30. Wilkinson B, Gilbert HF. Protein disulfide isomerase. *Biochim. Biophys. Acta.*  
426 2004;1699:35–44.
- 427 31. Walker AK, Farg MA, Bye CR, McLean CA, Horne MK, Atkin JD. Protein disulphide  
428 isomerase protects against protein aggregation and is S-nitrosylated in amyotrophic  
429 lateral sclerosis. *Brain.* 2010;133:105–16.
- 430 32. Laurindo FR, Fernandes DC, Amanso AM, Lopes LR, Santos CX. Novel role of protein  
431 disulfide isomerase in the regulation of NADPH oxidase activity: pathophysiological  
432 implications in vascular diseases. *Antioxid. Redox Signal.* 2008;10:1101–13.
- 433 33. Marambio P, Toro B, Sanhueza C, Troncoso R, Parra V, Verdejo H, et al. Glucose  
434 deprivation causes oxidative stress and stimulates aggresome formation and autophagy  
435 in cultured cardiac myocytes. *Biochim. Biophys. Acta.* 2010;1802:509–18.
- 436 34. Mo GL, Li Y, Du RH, Dai DZ, Cong XD, Dai Y. Isoproterenol induced stressful reactions  
437 in the brain are characterized by inflammation due to activation of NADPH oxidase and  
438 ER stress: attenuated by Apocynin, Rehmannia complex and Triterpene acids.  
439 *Neurochem. Res.* 2014;39:719–30.
- 440 35. Kim EM, Shin EJ, Choi JH, Son HJ, Park IS, Joh TH, et al. Matrix metalloproteinase-3 is  
441 increased and participates in neuronal apoptotic signaling downstream of caspase-12  
442 during endoplasmic reticulum stress. *J. Biol. Chem.* 2010;285:16444–52.
- 443 36. Kaplan A, Spiller KJ, Towne C, Kanning KC, Choe GT, Geber A, et al. Neuronal matrix  
444 metalloproteinase-9 is a determinant of selective neurodegeneration. *Neuron.*  
445 2014;81:333–48.

- 446 37. Kim EM, Hwang O. Role of matrix metalloproteinase-3 in neurodegeneration. J.  
447 Neurochem. 2011;116:22–32.
- 448 38. Abdelnaseer MM, Elfauomy NM, Esmail EH, Kamal MM, Elsayy EH. Matrix  
449 Metalloproteinase-9 and Recovery of Acute Ischemic Stroke. J. Stroke Cerebrovasc. Dis.  
450 2017;26:733–40.
- 451 39. Ma F, Rodriguez S, Buxo X, Morancho A, Riba-Llena I, Carrera A, et al. Plasma Matrix  
452 Metalloproteinases in Patients With Stroke During Intensive Rehabilitation Therapy.  
453 Arch. Phys. Med. Rehabil. 2016;97:1832–40.
- 454 40. Cunningham LA, Wetzel M, Rosenberg GA. Multiple roles for MMPs and TIMPs in  
455 cerebral ischemia. Glia. 2005;50:329–39.
- 456 41. Hu Q, Chen C, Yan J, Yang X, Shi X, Zhao J, et al. Therapeutic application of gene  
457 silencing MMP-9 in a middle cerebral artery occlusion-induced focal ischemia rat model.  
458 Exp. Neurol. 2009;216:35–46.

459

## 460 **FIGURE LEGENDS**

461 **FIG. 1.** Neurological assessments of rats after MCAO. (A) GUW, MCAO and Sham Rats were  
462 subjected to neurological deficit score. (B & C) TTC staining was performed in the brain slices  
463 of the above mentioned three groups, the volume of the white infarct region was quantified.  
464 Data expressed as mean  $\pm$  SD. n = 6. One-way ANOVA *post hoc* Tukey's test. vs Sham, ###  
465  $p < 0.001$ , vs MCAO, \*\*\*  $p < 0.001$ .

466 **FIG. 2.** Endoplasmic stress in rats after MCAO. Seven days after MCAO, the brains were  
467 harvested to perform cresyl violet staining to assess the number of intensely stained neurons  
468 (A). The faintly stained cells were less intensely stained and have a larger cell size (black

469 arrowhead). The intensely stained cells were densely stained and have a smaller cell size (black  
470 arrow). The amount of intensely stained cells was quantified (B). Immunohistochemistry of the  
471 amount of ubiquitin puncta per cells (C & D) and caspase-12 positive cells in the three groups  
472 were quantified (E & F). Data expressed as mean  $\pm$  SD. n=3. One-way ANOVA *post hoc*  
473 Tukey's test. Vs Sham, ###  $p < 0.001$ , vs MCAO, \*\*\*  $p < 0.001$ .

474 **FIG. 3.** Neuroprotective effect of GUW against OGD/R. (A) The cytotoxicity profile of GE,  
475 UR and GUW 24 hr after incubating with differentiated SK-N-SH cells. (B) The cell viability  
476 of SK-N-SH cells treated with herbal extracts at various concentrations during OGD/R. (C)  
477 Immunocytochemistry using neurofilament 160 kDa (NF160) as a marker to show the neurite  
478 formation in SK-N-SH cells after OGD/R. (D) The number of neurite connection per nucleus  
479 was evaluated among three groups. Data expressed as mean  $\pm$  SD. n=3. One-way ANOVA  
480 *post hoc* Tukey's test. Vs Sham, #  $p < 0.05$ , vs MCAO, \*  $p < 0.05$ .

481 **FIG. 4.** Effect of GUW against endoplasmic reticulum stress. (A) Fluorescence microscopy of  
482 ubiquitin (green) and NF160 (red) staining in SK-N-SH cells. White arrows indicate the status  
483 of overlapping of ubiquitin and NF160 fluorescence. Arrowheads indicate the presence of  
484 ubiquitin puncta. (B) The number of ubiquitin puncta per nucleus was measured among three  
485 groups. Data expressed as mean  $\pm$  SD. n=3. One-way ANOVA *post hoc* Tukey's test. Vs Sham,  
486 ###  $p < 0.001$ , vs OGD/R, \*\*\*  $p < 0.05$ . Western blot showing the protein expression of GRP78,  
487 PDI, XBP-1(u) and pro-caspase-12.

488 **Fig. 5** Effect of GUW treatment on Evans blue leakage after ischemia/reperfusion in rats.  
489 (A) Representative *ex vivo* NIRF imaging of the rats from different treatment group. At day  
490 7 after MCAO, rats were infused with Evans blue dye and brains were harvested to evaluate  
491 the BBB integrity. (B) The Target-to-background ratios (TBRs) calculated from ROI  
492 analyses of NIRF image of Evans blue signal. The images were normalized on the color

493 scaling bar. Data are expressed as mean  $\pm$  SD. n=6. One-way ANOVA *post hoc* Tukey's test.  
494 #  $p < 0.001$  vs Sham group; \*  $p < 0.001$  vs MCAO.

495 **Fig. 6** GUV reduced MMP expression. Representative *in vivo* NIRF imaging of the rats at  
496 day 5 post MCAO. NIRF imaging was taken after the MMPsense 680 was injected to the  
497 brains for 72h. (A) Control group. (B) GUV treatment group. (C) The Target-to-background  
498 ratios (TBRs) calculated from ROI analyses of NIRF image. The images were normalized  
499 on the color scaling bar. Data are expressed as mean  $\pm$  SD. Student's t-test. n=6, \*  $p < 0.05$ ,  
500 \*\*  $p < 0.01$ , \*\*\* $p < 0.001$  vs MCAO.

501 **Fig. 7** Representative *ex vivo* NIRF imaging of the brains 7 days after MCAO. Brains were  
502 harvested at day 7. The MMPsense signal in both the whole brain and 2mm brain slices  
503 were captured. (A) Whole brain of control group. (B) Whole brain of GUV treatment group.  
504 (C) Brain slices of control group. (D) Brain slices of GUV treatment group. Target-to-  
505 background ratios (TBRs) calculated from ROI analyses of NIRF image *ex vivo* of brain. (E)  
506 The TBRs of different groups in the whole brain. Data are expressed as mean  $\pm$  SD. n=6, #  $p$   
507  $< 0.001$  vs Sham group; \*  $p < 0.001$  vs Control group, by one way ANOVA *post hoc* Tukey's  
508 test. (F) The TBRs of different groups in the brain slices. Data are expressed as mean  $\pm$  SD.  
509 n=6. Student's t-test. \*  $p < 0.001$  vs MCAO.

Figure 1

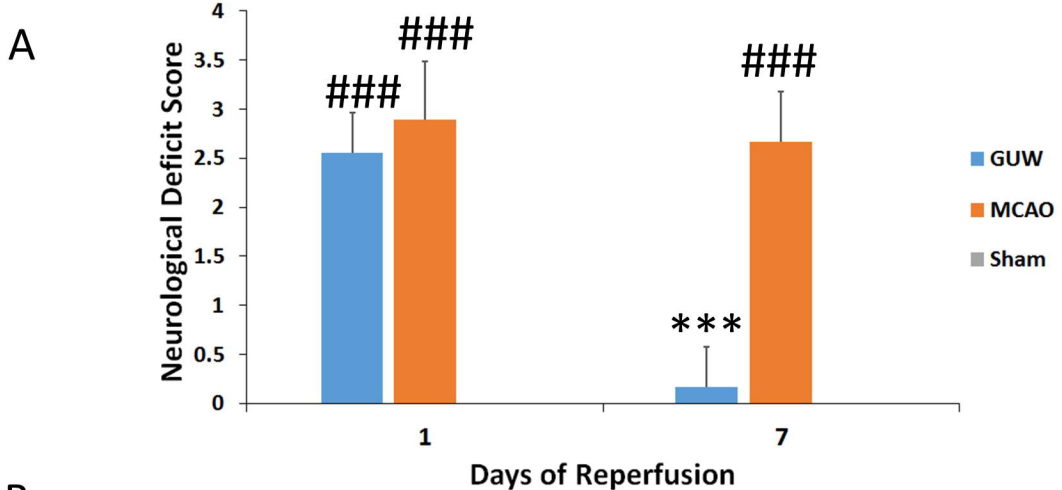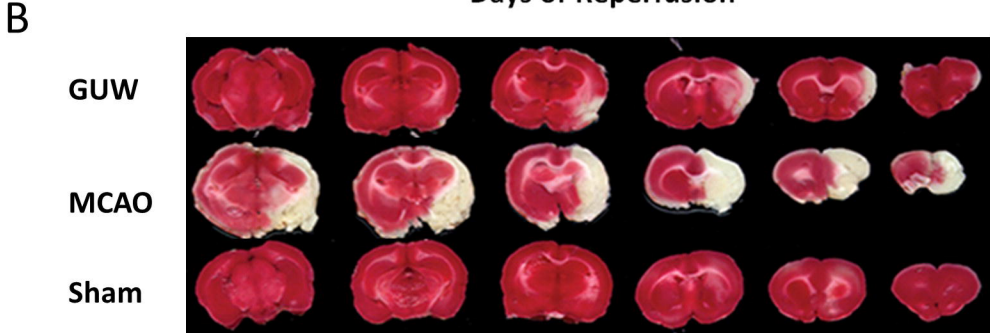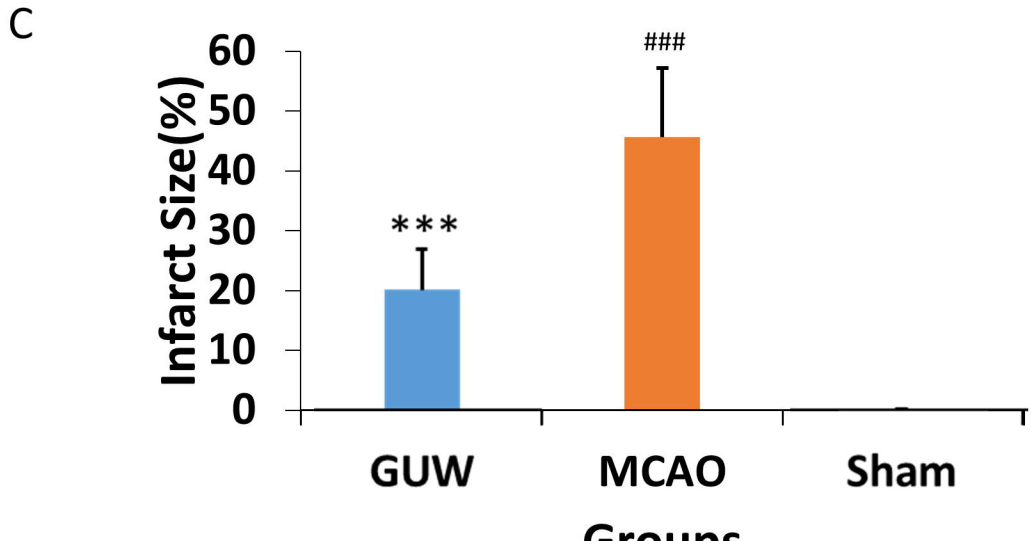

Figure 2

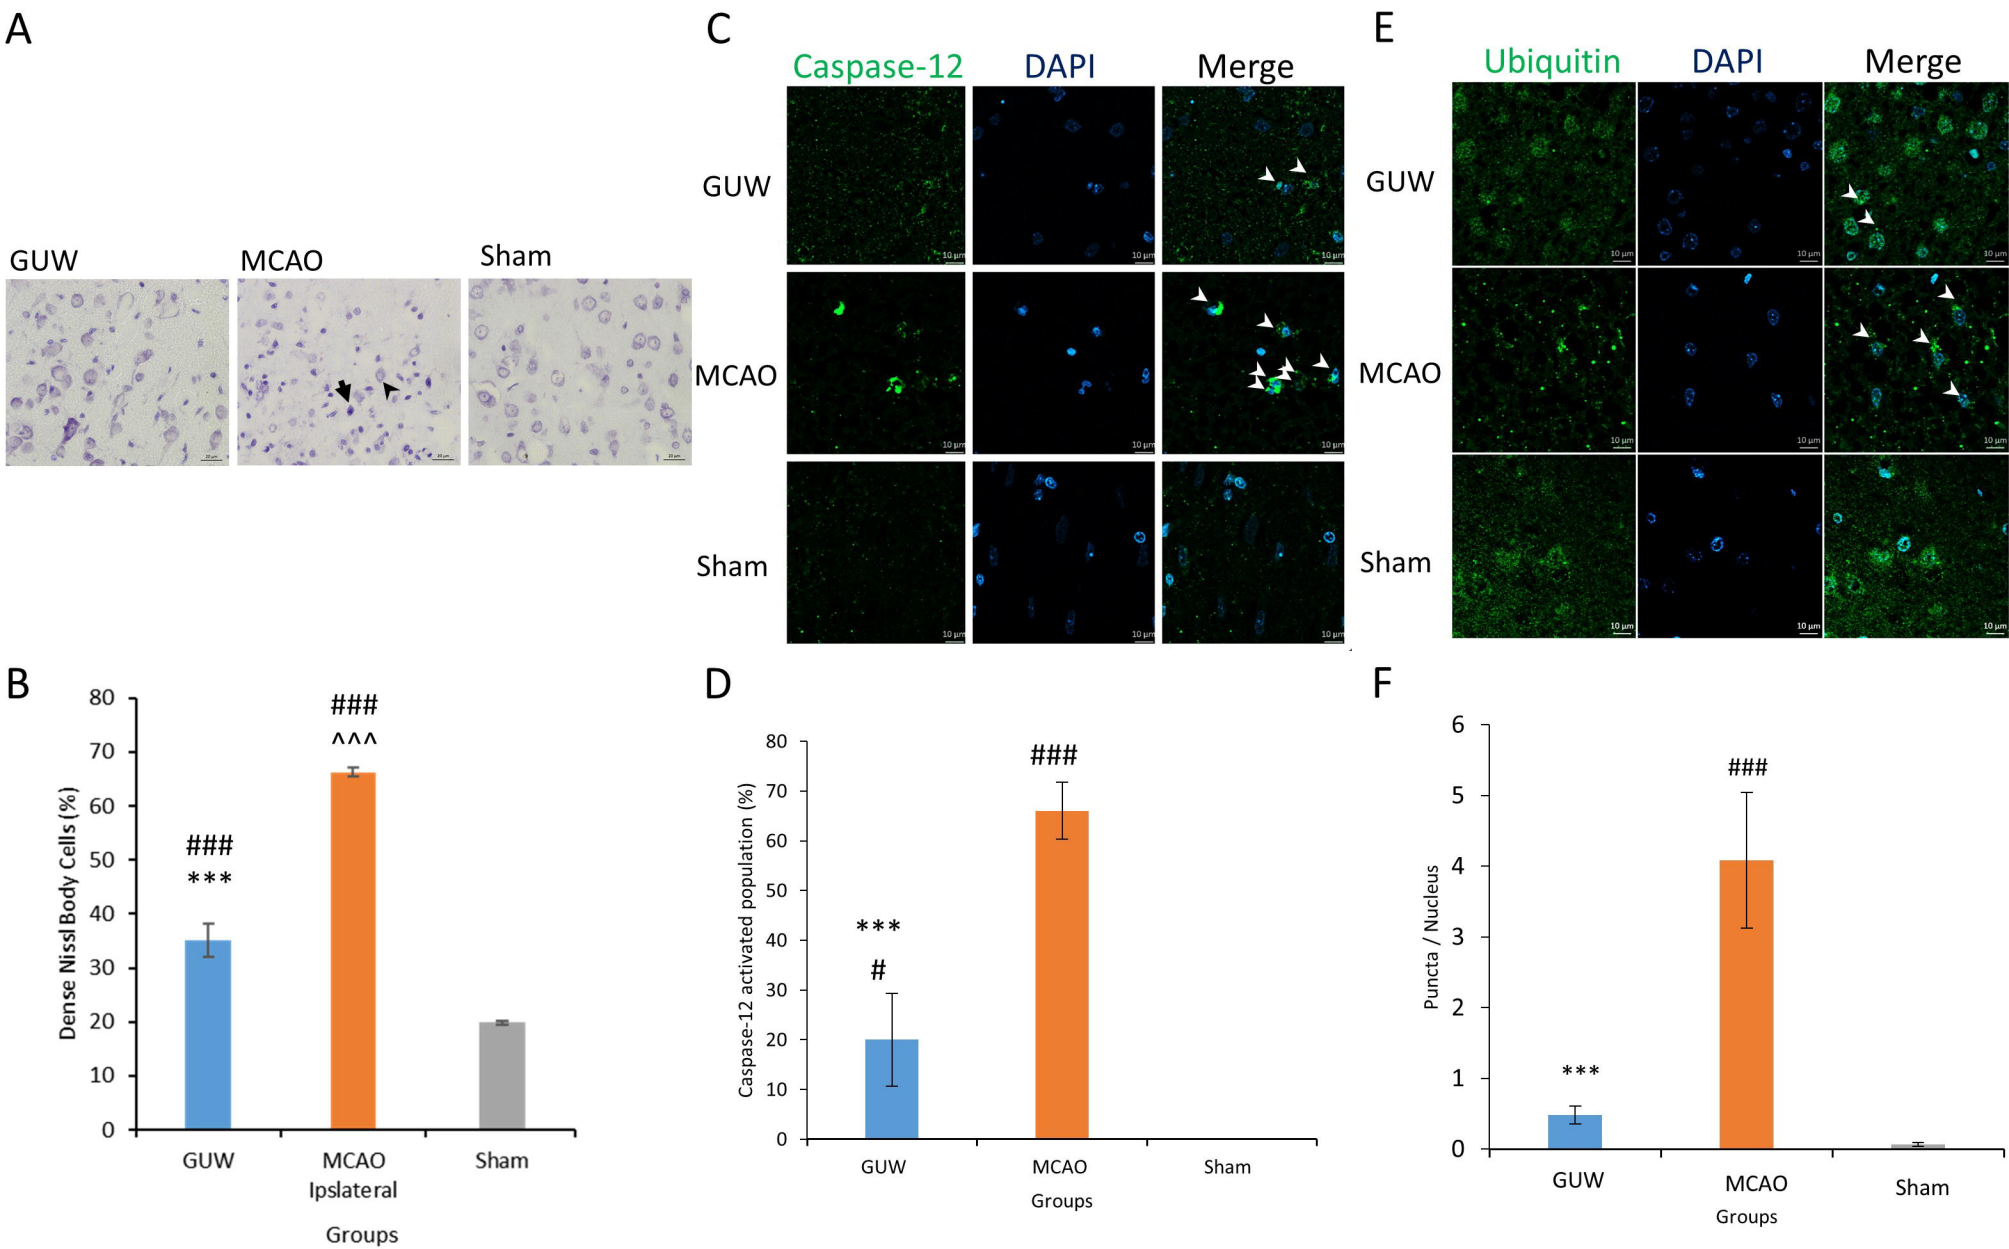



Figure 3

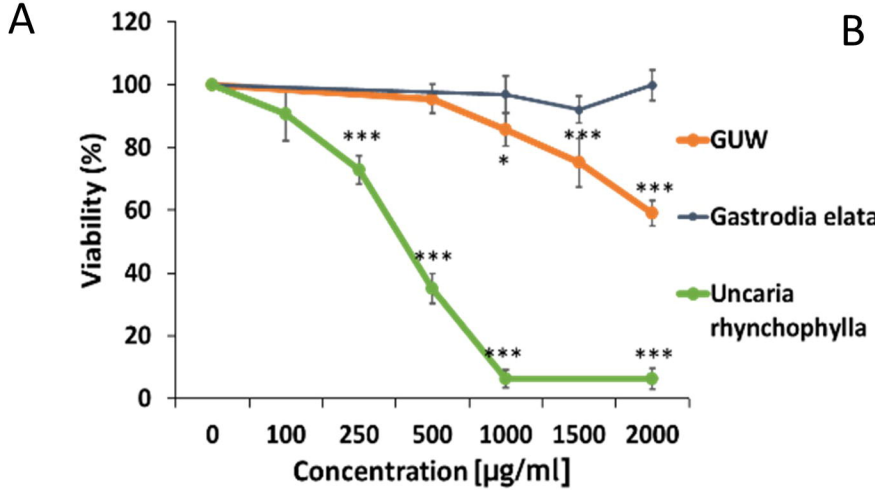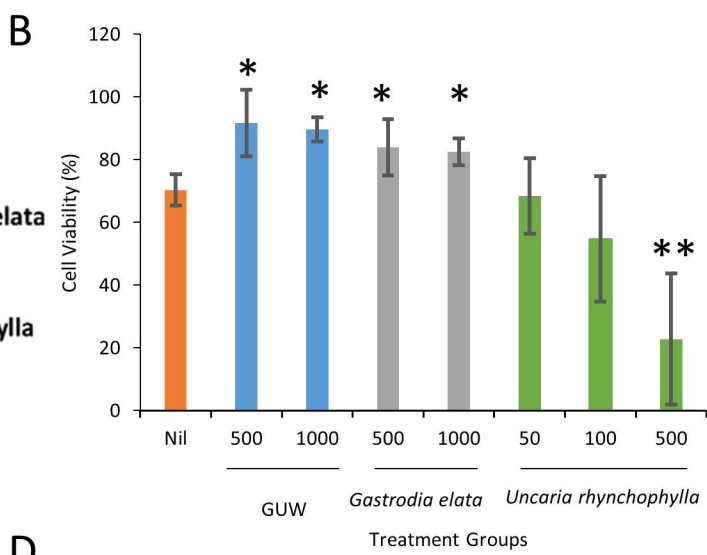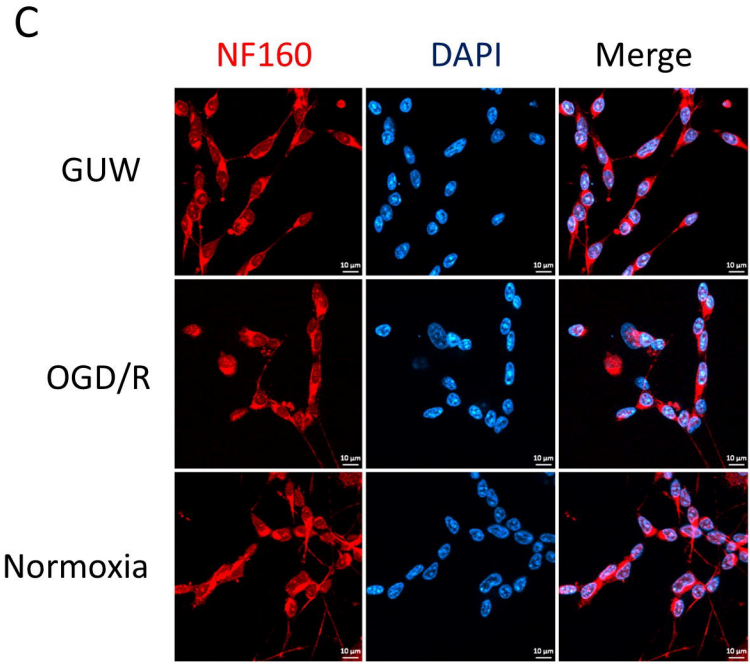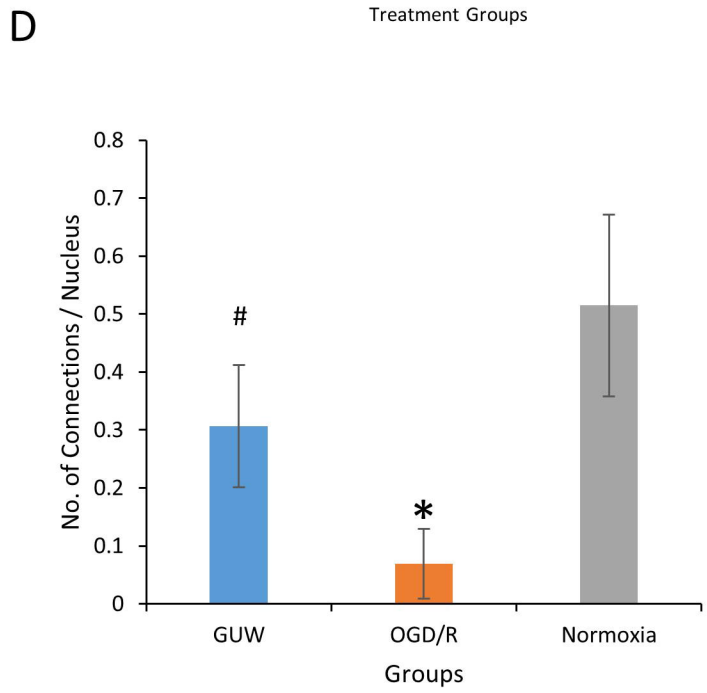

Figure 4

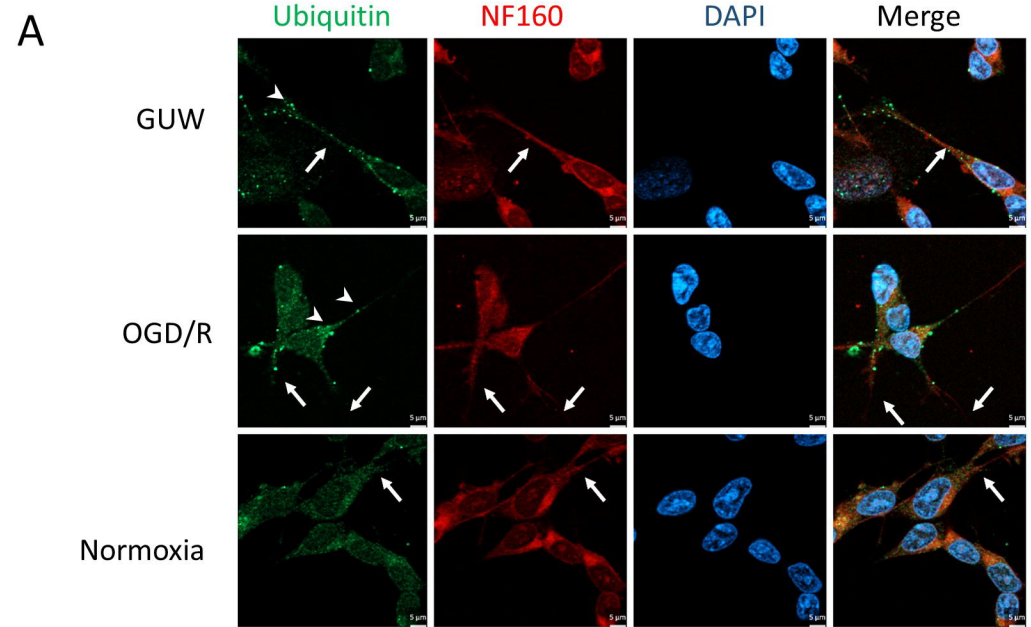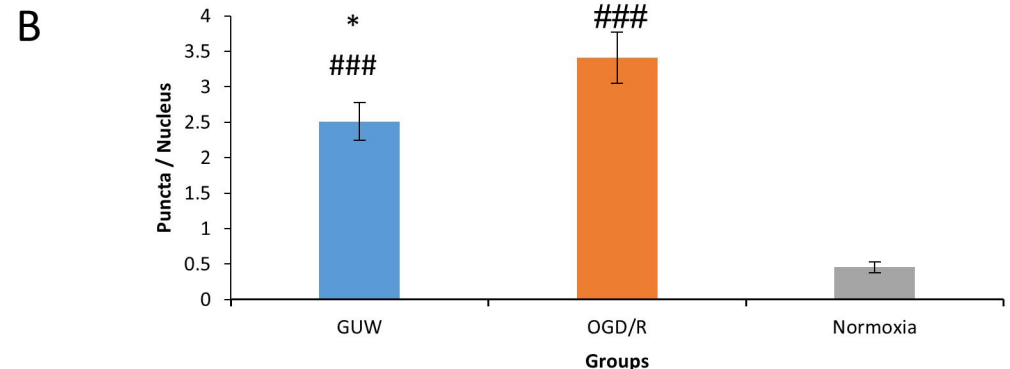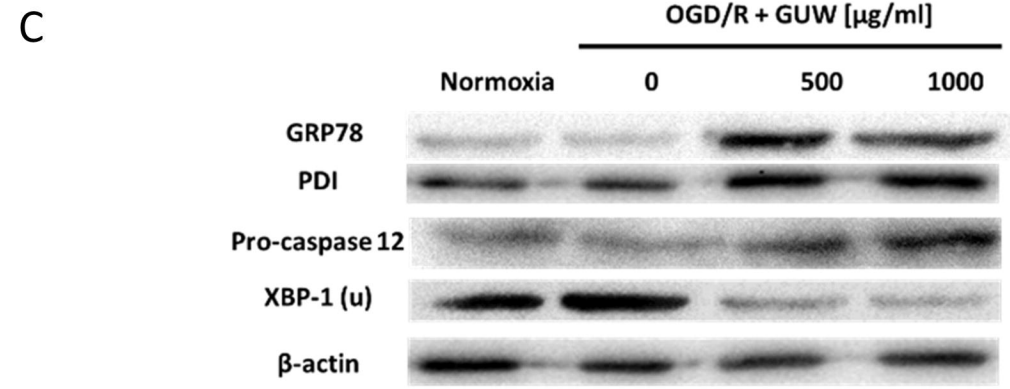

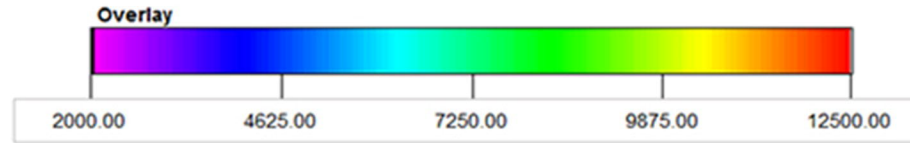

A

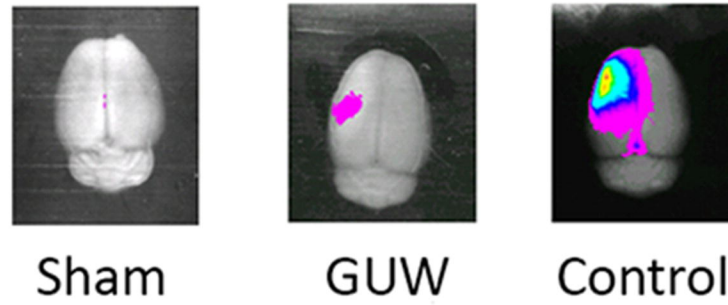

B

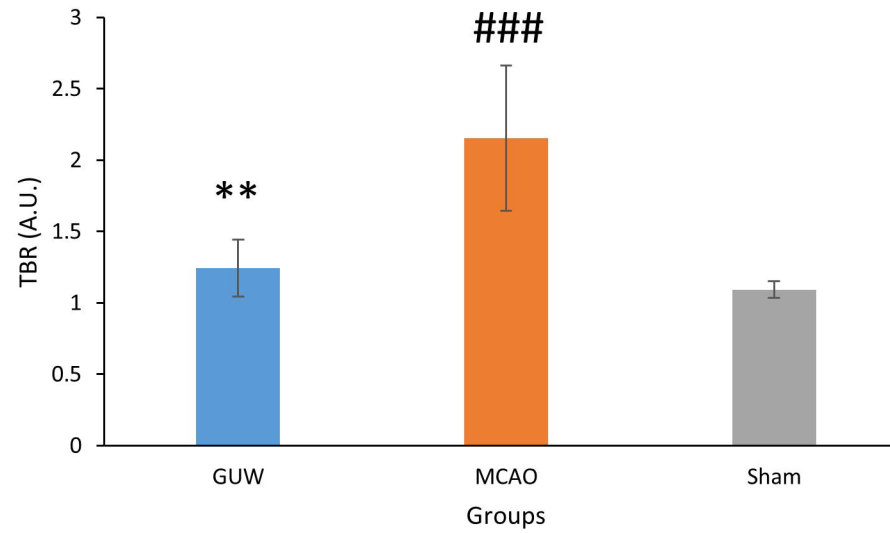

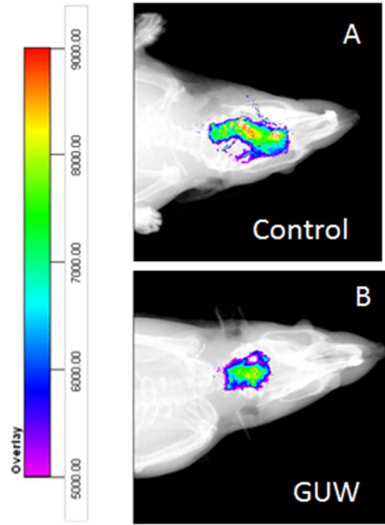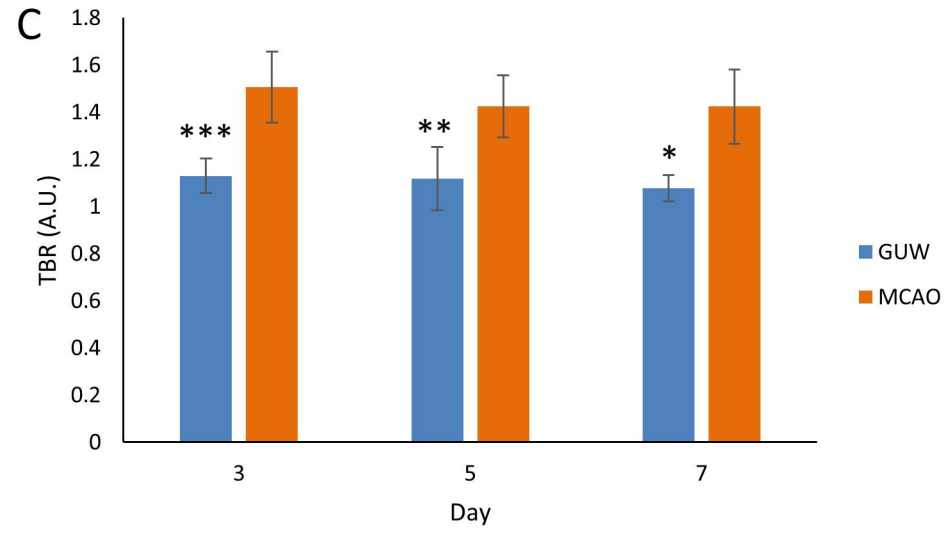

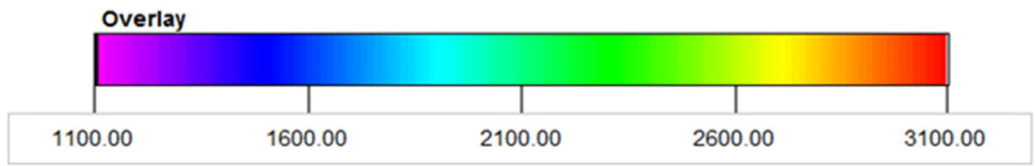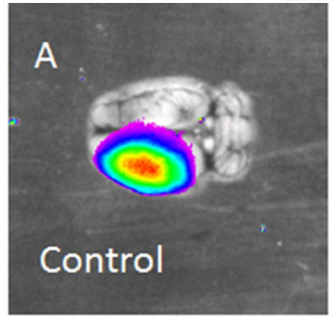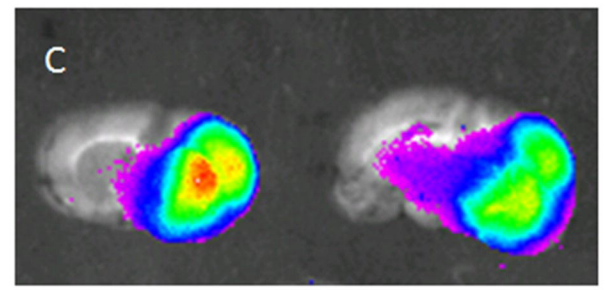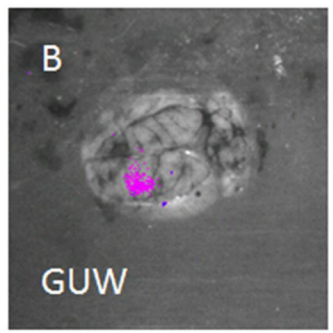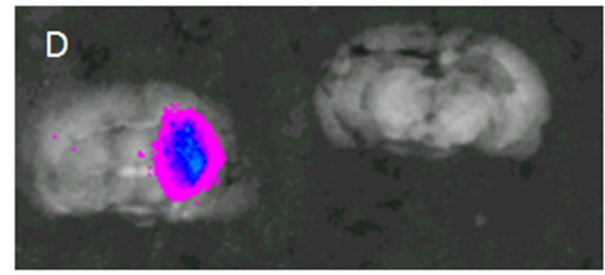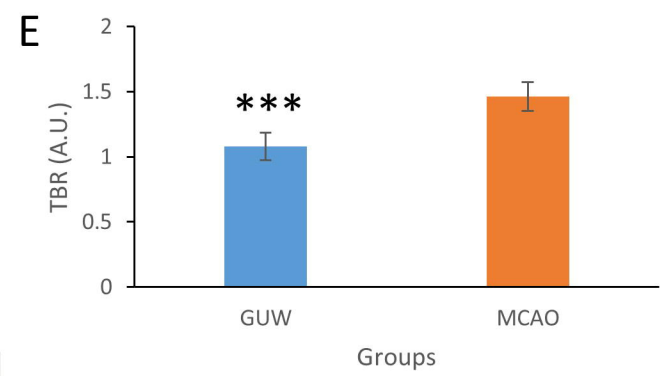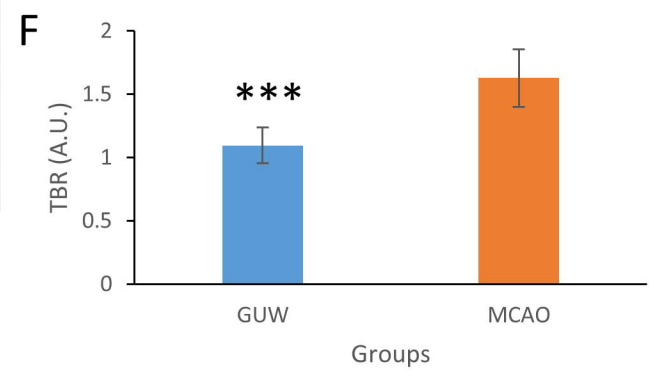

Source: https://www.biorxiv.org/content/10.1101/2021.07.21.452303v1.full.pdf
